# Supplementary material
Source: Springer Nature journal article supplement (https://www.springermedizin.de/resource/supplementary/12936_2007_460_MOESM1_ESM.pdf/9547498)

1 2 3 4 5 6 7 8 9 10 11 12 13

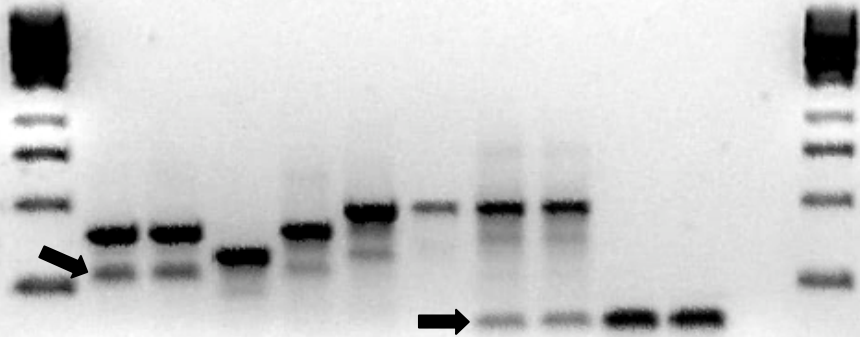

Supplement: MOESM1 [file 9547498]
